# Supplementary material for: Au9 nanocluster adsorption and agglomeration control through sulfur modification of mesoporous TiO2
Source: Royal Society of Chemistry journal article supplement (doi:10.1039/d3cp05353a), 2024-01-01
Supplement: d3cp05353a1.pdf [file d3cp05353a1.pdf]

## Supporting information

### *Study of TiO<sub>2</sub> Surface Modification Effect on Size and Intensity Ratio of Au<sub>9</sub> Nanoclusters by XPS Analysis*

Anahita Motamedisade,<sup>a</sup> Martin R. Johnston,<sup>a</sup> Amjad E.H. Alotaibi,<sup>a</sup> Gunther Andersson<sup>\*a</sup>

a. Institute for Nanoscale Science and Technology, Flinders University, Adelaide 5042, Australia  
E-mail: [gunther.andersson@flinders.edu.au](mailto:gunther.andersson@flinders.edu.au), [mota0010@flinders.edu.au](mailto:mota0010@flinders.edu.au)

Table S1. Assessment of intensity ratio of Si, and S grafted on the surface of MTiO<sub>2</sub>. The intensity of

Si and S are 3.70 and 2.80 %, respectively.

| Elements | Relative intensity (%) |
|----------|------------------------|
| C        | 21.8                   |
| O        | 59.0                   |
| Sn       | 0.7                    |
| Ti       | 18.5                   |
| S        | 2.8                    |
| Si       | 3.7                    |

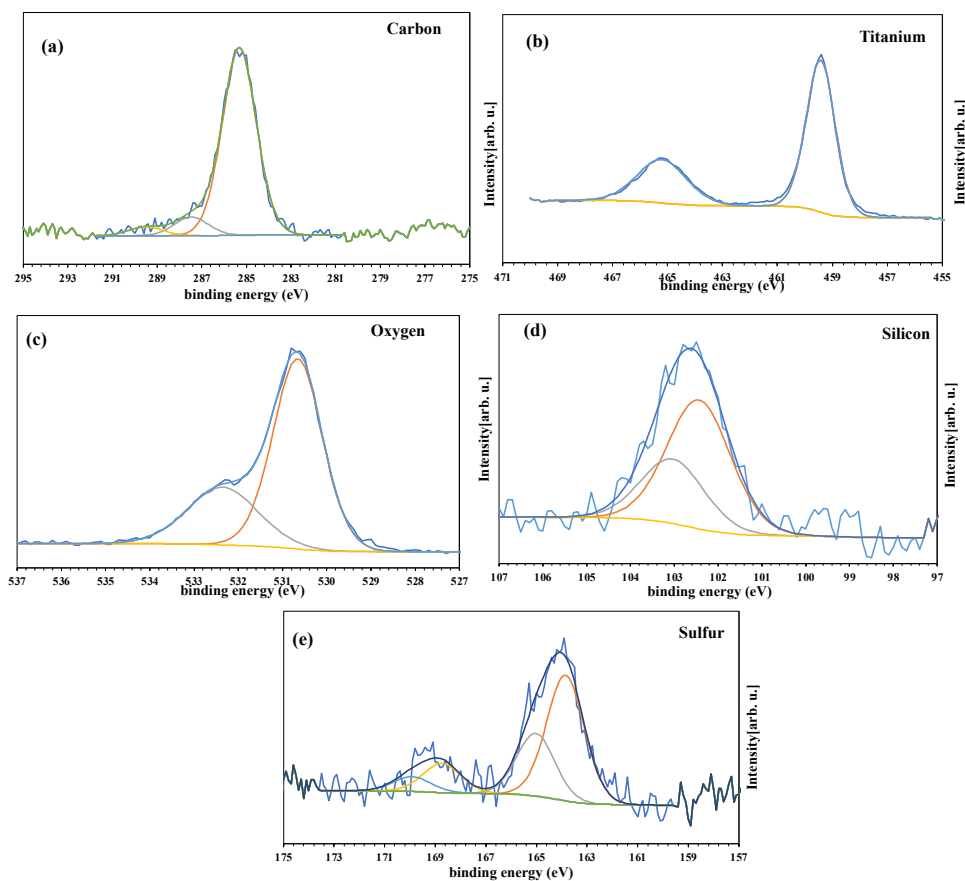

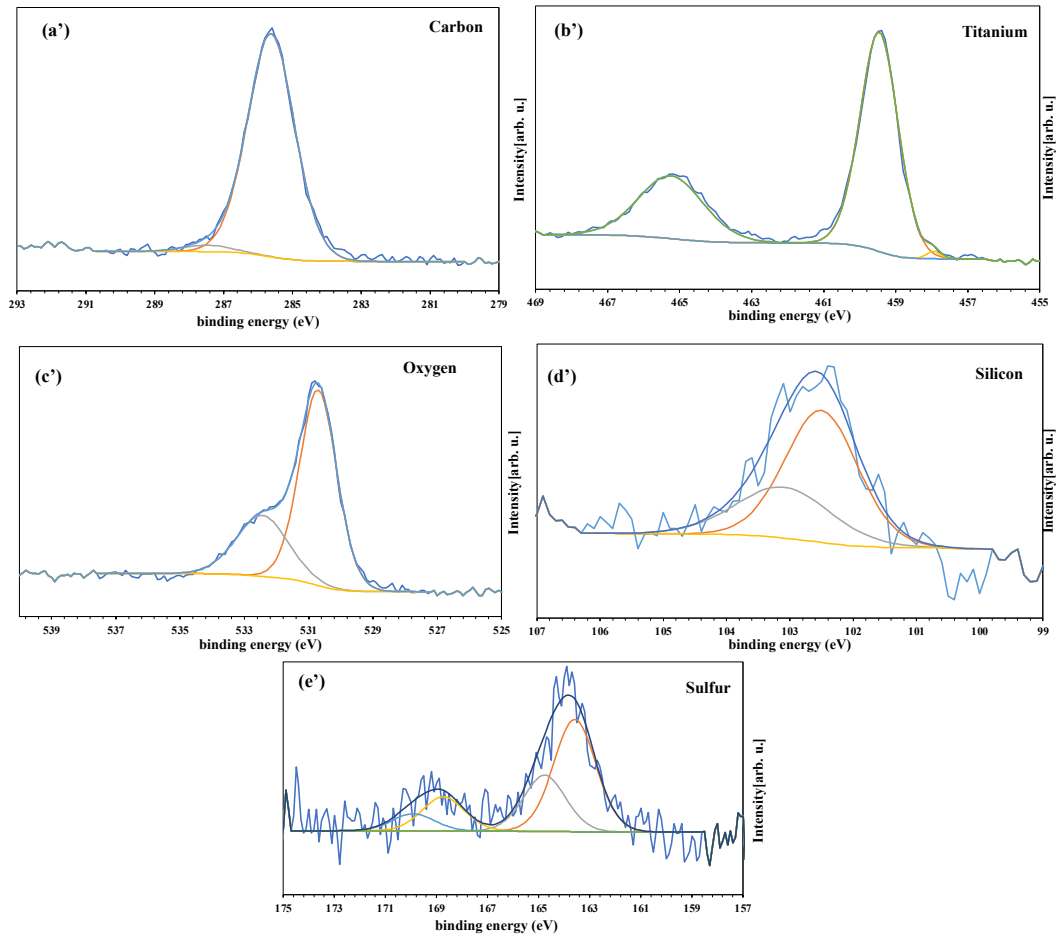

Figure S1. XPS High resolution of (a) C1s, (b) Ti2p, (c) O1s, (d) Si2p, and (e) S2p for Au<sub>9</sub>NCs/SMTiO<sub>2</sub> after deposition and (a') C1s, (b') Ti2p, (c') O1s, (d') Si2p, and (e') S2p for anealed Au<sub>9</sub>NCs/SMTiO<sub>2</sub> nanocomposites.

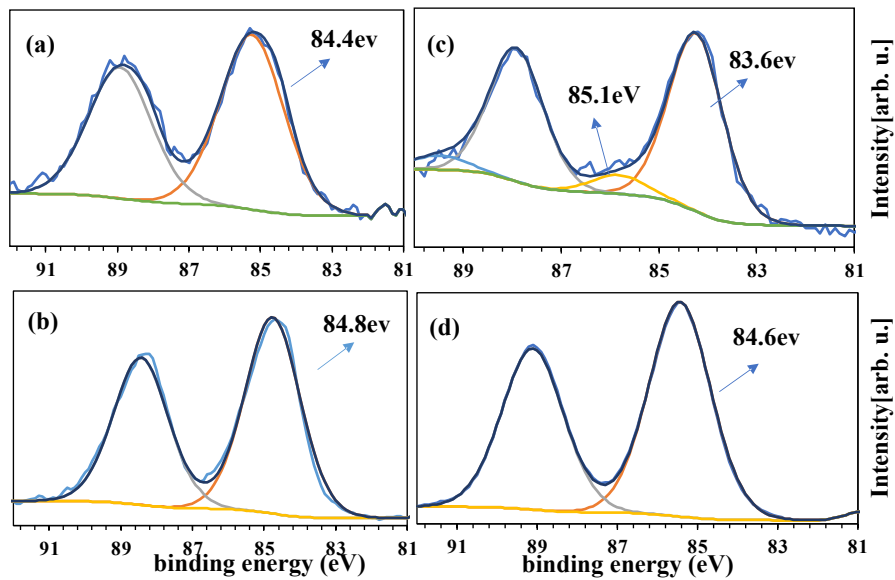

*Figure S2. XPS High resolution of Au4f after deposition process of Au<sub>9</sub> NCs on (a) MTiO<sub>2</sub> film (b) SMTiO<sub>2</sub> film and after annealing process of (c) Au<sub>9</sub>/MTiO<sub>2</sub> (d) Au<sub>9</sub>/SMTiO<sub>2</sub> films.*
